# Supplementary material
Source: Research Square preprint supplement (doi:10.21203/rs.3.rs-9261940/v1)
Supplement: Supplementary file 1 [file dc1fe5eafa218c72db765c92.docx]

**Supplementary Information (SI)**

**Solubility determination, thermodynamic analysis and molecular dynamics simulation of N-Ethyl-p-toluenesulfonamide in three binary solvents**

*Junbao Gua, b, c, Xiao Biana, b, c, Binghai Wua, b, c, Wenzhen Lia, b, c, Weibing Donga, b, c, Guangle Wanga, b, c**

*a School of Chemistry and Materials Science, Qinghai Minzu University, XiNing 810007, China*

*b Key Laboratory of Resource Chemistry and Eco-environmental Protection in Qinghai-Tibet Plateau, State Ethnic Affairs Commission, China*

*c Qinghai Provincial Key Laboratory of Nanomaterials and Technology, Qinghai Minzu University, XiNing 810007, China*

**Supplementary Information (SI)**

The empirical parameters A1 to A9 of the Ma model for N-PTSA are listed in Table S1. Tables S2-S4 present the experimental molar fraction solubility (x), calculated solubility (xcal), relative deviation (RD), average ARD, and average RMSD of N-PTSA in binary solvents (methanol (w) + water, ethanol (w) + water, and n-propanol (w) + water) at different temperatures. The apparent thermodynamic parameters and R² values for the dissolution of N-PTSA in the three mixed solvent systems are provided in Table S5.

| w | A1·103 | A2·103 | A3·103 | A4·103 | A5·103 | A6·103 | A7·103 | A8·103 | A9·103 |
| --- | --- | --- | --- | --- | --- | --- | --- | --- | --- |
| methanol+water |  |  |  |  |  |  |  |  |  |
| 0.4 | -9.09 | -2.85 | 7.56 | -4.52 | -3.13 | -2.33 | -0.48 | 5.24 | -9.09 |
| 0.5 | -2.95 | 0.68 | 0.67 | -2.99 | -1.52 | 0.15 | -1.40 | -1.04 | -2.95 |
| 0.6 | -12.91 | 1.72 | 4.53 | -8.92 | -6.70 | -4.97 | -2.67 | -2.44 | -12.91 |
| 0.7 | -25.33 | -0.51 | 11.91 | -18.55 | -13.13 | -20.23 | 6.95 | 0.43 | -25.33 |
| 0.8 | -14.45 | -8.37 | 0.21 | -12.11 | -11.92 | -10.54 | -9.06 | 9.39 | -14.45 |
| 0.9 | -9.09 | -1.04 | 0.01 | -8.59 | -8.01 | -7.61 | -7.17 | 1.00 | -9.09 |
| ethanol+water |  |  |  |  |  |  |  |  |  |
| 0.4 | 21.47 | 2.15 | -0.35 | 13.49 | 8.57 | 5.60 | 2.82 | -3.18 | 21.47 |
| 0.5 | -4.35 | 0.23 | -0.16 | -3.09 | -2.29 | -1.69 | -1.17 | -0.32 | -4.35 |
| 0.6 | -13.86 | -1.33 | 1.62 | -11.00 | -8.83 | -6.96 | -5.60 | 1.56 | -13.86 |
| 0.7 | -11.12 | 1.76 | -1.35 | -9.66 | -8.37 | -7.31 | -6.55 | -2.16 | -11.12 |
| 0.8 | -9.94 | 2.15 | -2.98 | -8.10 | -2.77 | -11.75 | -9.41 | -2.46 | -9.94 |
| 0.9 | -7.27 | 2.16 | 2.78 | -6.62 | -6.57 | -6.16 | -5.84 | -2.33 | -7.27 |
| npropanol+water |  |  |  |  |  |  |  |  |  |
| 0.4 | -3.12 | -2.27 | 0.38 | -2.25 | -1.70 | 0.33 | -2.63 | 3.13 | -3.12 |
| 0.5 | -12.01 | 4.42 | 1.75 | -7.73 | 0.58 | -7.18 | -1.03 | -5.81 | -12.01 |
| 0.6 | -8.94 | -0.64 | -1.53 | -7.57 | -6.27 | -5.12 | -4.17 | 0.70 | -8.94 |
| 0.7 | -6.53 | 2.20 | -0.47 | -5.91 | -5.14 | -4.66 | -4.14 | -2.54 | -6.53 |
| 0.8 | -6.64 | -3.13 | -2.20 | -7.06 | -6.15 | -5.60 | -5.64 | 3.29 | -6.64 |
| 0.9 | -5.00 | 4.92 | -0.72 | -5.33 | -4.55 | -4.78 | -4.43 | -5.14 | -5.00 |

**Table S1 The empirical parameters A1 to A9 of the Ma model**

**Table S2 Values of experimental mole-fraction solubility (*x*), calculated solubility ), relative deviation (RD) of N-PTSA in binary solvent (methanol (w) + water) at different temperature**

| T/K | *x* | Apelblat |  | λh |  | MA |  | NRTL |  |
| --- | --- | --- | --- | --- | --- | --- | --- | --- | --- |
|  | 100RD |  | 100RD |  | 100RD |  | 100RD |
| *w*=0.4 |  |  |  |  |  |  |  |  |  |
| 288.15 | 0.0107 | 0.0121 | -12.6279 | 0.0766 | -1.6028 | 0.0108 | 0.0027 | 0.0117 | -8.9434 |
| 293.15 | 0.0213 | 0.0226 | -6.3824 | 0.1064 | 1.0995 | 0.0214 | 0.0083 | 0.0194 | 8.9321 |
| 298.15 | 0.0425 | 0.0423 | 0.5122 | 0.1518 | 1.8186 | 0.0418 | -0.0159 | 0.0379 | 10.7912 |
| 303.15 | 0.0815 | 0.0789 | 3.1287 | 0.2175 | 1.0468 | 0.0800 | -0.0183 | 0.0805 | 1.2226 |
| 308.15 | 0.1466 | 0.1471 | -0.3659 | 0.3038 | -0.2833 | 0.1501 | 0.0242 | 0.1594 | -8.7651 |
| 313.15 | 0.2728 | 0.2736 | -0.3112 | 0.4093 | -0.8800 | 0.2766 | 0.0140 | 0.2908 | -6.5930 |
| 318.15 | 0.5081 | 0.5078 | 0.0564 | 0.5133 | -2.2990 | 0.5009 | -0.0143 | 0.4663 | 8.2392 |
|  |  |  |  |  |  |  |  |  |  |
| *w*=0.5 |  |  |  |  |  |  |  |  |  |
| 288.15 | 0.0159 | 0.0137 | 13.9604 | 0.0149 | 6.5332 | 0.0162 | 0.0155 | 0.0162 | -6.8878 |
| 293.15 | 0.0314 | 0.0278 | 11.4169 | 0.0299 | 4.6629 | 0.0302 | -0.0386 | 0.0217 | 8.1530 |
| 298.15 | 0.0552 | 0.0542 | 1.8282 | 0.0581 | -5.2000 | 0.0555 | 0.0051 | 0.0345 | 7.4883 |
| 303.15 | 0.0953 | 0.1016 | -6.5621 | 0.1078 | -13.0544 | 0.1005 | 0.0539 | 0.0757 | 0.0562 |
| 308.15 | 0.1836 | 0.1834 | 0.1148 | 0.1887 | -2.7610 | 0.1791 | -0.0243 | 0.1970 | -6.6815 |
| 313.15 | 0.3225 | 0.3196 | 0.9010 | 0.3066 | 4.9320 | 0.3149 | -0.0237 | 0.3822 | -4.0040 |
| 318.15 | 0.5381 | 0.5390 | -0.1781 | 0.4559 | 15.2792 | 0.5462 | 0.0151 | 0.5037 | 5.9932 |
|  |  |  |  |  |  |  |  |  |  |
| *w*=0.6 |  |  |  |  |  |  |  |  |  |
| 288.15 | 0.0245 | 0.0206 | 16.0381 | 0.0221 | 9.9935 | 0.0229 | -0.0664 | 0.0253 | -3.0006 |
| 293.15 | 0.0391 | 0.0425 | -8.5743 | 0.0431 | -10.1605 | 0.0441 | 0.1261 | 0.0382 | 2.4550 |
| 298.15 | 0.0807 | 0.0812 | -0.5975 | 0.0809 | -0.2104 | 0.0805 | -0.0024 | 0.0765 | 5.2124 |
| 303.15 | 0.1440 | 0.1443 | -0.2001 | 0.1442 | -0.1539 | 0.1400 | -0.0279 | 0.1450 | -0.6860 |
| 308.15 | 0.2421 | 0.2397 | 0.9716 | 0.2412 | 0.3660 | 0.2325 | -0.0396 | 0.2518 | -4.0246 |
| 313.15 | 0.3719 | 0.3736 | -0.4506 | 0.3722 | -0.0740 | 0.3696 | -0.0063 | 0.3800 | -2.1578 |
| 318.15 | 0.5488 | 0.5484 | 0.0647 | 0.5245 | 4.4222 | 0.5640 | 0.0278 | 0.5279 | 3.8127 |
|  |  |  |  |  |  |  |  |  |  |
| *w*=0.7 |  |  |  |  |  |  |  |  |  |
| 288.15 | 0.0504 | 0.0403 | 20.1074 | 0.0481 | 4.6737 | 0.0477 | -0.0544 | 0.0508 | -0.8456 |
| 293.15 | 0.0774 | 0.0786 | -1.4718 | 0.0826 | -6.6803 | 0.0840 | 0.0847 | 0.0767 | 0.9020 |
| 298.15 | 0.1351 | 0.1388 | -2.7511 | 0.1365 | -1.0308 | 0.1387 | 0.0270 | 0.1334 | 1.2519 |
| 303.15 | 0.2220 | 0.2232 | -0.5387 | 0.2148 | 3.2800 | 0.2155 | -0.0297 | 0.2235 | -0.6638 |
| 308.15 | 0.3238 | 0.3289 | -1.5723 | 0.3191 | 1.4678 | 0.3160 | -0.0243 | 0.3291 | -1.6262 |
| 313.15 | 0.4558 | 0.4463 | 2.0794 | 0.4442 | 2.5412 | 0.4390 | -0.0368 | 0.4525 | 0.7195 |
| 318.15 | 0.5568 | 0.5605 | -0.6649 | 0.5779 | -3.7814 | 0.5798 | 0.0411 | 0.5542 | 0.4685 |
|  |  |  |  |  |  |  |  |  |  |
| *w*=0.8 |  |  |  |  |  |  |  |  |  |
| 288.15 | 0.0792 | 0.0733 | 7.4413 | 0.0794 | -0.3005 | 0.0784 | -0.0094 | 0.0798 | -0.7626 |
| 293.15 | 0.1239 | 0.1212 | 2.1844 | 0.1234 | 0.4550 | 0.1244 | 0.0040 | 0.1221 | 1.4588 |
| 298.15 | 0.1836 | 0.1873 | -1.9903 | 0.1848 | -0.6685 | 0.1870 | 0.0183 | 0.1833 | 0.1640 |
| 303.15 | 0.2679 | 0.2714 | -1.2848 | 0.2658 | 0.7946 | 0.2671 | -0.0030 | 0.2701 | -0.8157 |
| 308.15 | 0.3612 | 0.3704 | -2.5574 | 0.3652 | -1.1028 | 0.3640 | 0.0078 | 0.3668 | -1.5481 |
| 313.15 | 0.4951 | 0.4780 | 3.4529 | 0.4778 | 3.4956 | 0.4745 | -0.0416 | 0.4865 | 1.7389 |
| 318.15 | 0.5783 | 0.5850 | -1.1462 | 0.5951 | -2.8890 | 0.5930 | 0.0254 | 0.5763 | 0.3574 |
|  |  |  |  |  |  |  |  |  |  |
| *w*=0.9 |  |  |  |  |  |  |  |  |  |
| 288.15 | 0.1111 | 0.1076 | 3.1780 | 0.1113 | -0.1281 | 0.1100 | -0.0098 | 0.1116 | -0.4093 |
| 293.15 | 0.1577 | 0.1592 | -0.9532 | 0.1594 | -1.0930 | 0.1603 | 0.0169 | 0.1570 | 0.4429 |
| 298.15 | 0.2249 | 0.2245 | 0.1782 | 0.2217 | 1.4220 | 0.2240 | -0.0043 | 0.2233 | 0.7484 |
| 303.15 | 0.3002 | 0.3029 | -0.8987 | 0.2988 | 0.4820 | 0.3008 | 0.0018 | 0.3012 | -0.3237 |
| 308.15 | 0.3875 | 0.3919 | -1.1337 | 0.3891 | -0.3999 | 0.3892 | 0.0042 | 0.3909 | -0.8723 |
| 313.15 | 0.4967 | 0.4875 | 1.8447 | 0.4891 | 1.5332 | 0.4863 | -0.0209 | 0.4937 | 0.5965 |
| 318.15 | 0.5807 | 0.5844 | -0.6332 | 0.5934 | -2.1915 | 0.5881 | 0.0126 | 0.5831 | -0.4048 |
| Average ARD% | | 3.1743 |  | 3.1388 |  | 2.4955 |  | 2.7182 |  |
| Average RMSD·102 | | 0.4235 |  | 1.2958 |  | 0.7033 |  | 0.8498 |  |

**Table S3 Values of experimental mole-fraction solubility (*x*), calculated solubility ), relative deviation (RD) of N-PTSA in binary solvent (ethanol (w) + water) at different temperature**

| T/K | *x* | Apelblat |  | λh |  | MA |  | NRTL |  |
| --- | --- | --- | --- | --- | --- | --- | --- | --- | --- |
|  | 100RD |  | 100RD |  | 100RD |  | 100RD |
| *w*=0.4 |  |  |  |  |  |  |  |  |  |
| 288.15 | 0.0198 | 0.0173 | 12.8775 | 0.0166 | 16.418 | 0.0194 | -0.0203 | 0.0207 | -4.5110 |
| 293.15 | 0.0309 | 0.0298 | 3.5064 | 0.0309 | 0.1527 | 0.0313 | 0.0111 | 0.0301 | 2.6442 |
| 298.15 | 0.0490 | 0.0516 | -5.3221 | 0.0557 | -13.6943 | 0.0516 | 0.0531 | 0.0468 | 4.6103 |
| 303.15 | 0.0900 | 0.0896 | 0.5242 | 0.0971 | -7.8768 | 0.0874 | -0.0295 | 0.0876 | 2.7202 |
| 308.15 | 0.1534 | 0.1556 | -1.4881 | 0.1621 | -5.7197 | 0.1513 | -0.0135 | 0.1585 | -3.3682 |
| 313.15 | 0.2734 | 0.2709 | 0.9397 | 0.2567 | 6.1143 | 0.2675 | -0.0217 | 0.2848 | -4.1447 |
| 318.15 | 0.4712 | 0.4719 | -0.1462 | 0.3815 | 19.0327 | 0.4823 | 0.0235 | 0.4548 | 3.4791 |
|  |  |  |  |  |  |  |  |  |  |
| *w*=0.5 |  |  |  |  |  |  |  |  |  |
| 288.15 | 0.0336 | 0.0289 | 14.1534 | 0.0312 | 7.1998 | 0.0330 | 0.0175 | 0.0348 | -3.3626 |
| 293.15 | 0.0552 | 0.0520 | 5.9073 | 0.0543 | 1.6051 | 0.0548 | -0.0076 | 0.0532 | 3.7395 |
| 298.15 | 0.0821 | 0.0891 | -8.5711 | 0.0916 | -11.5739 | 0.0890 | 0.0850 | 0.0800 | 2.5344 |
| 303.15 | 0.1477 | 0.1460 | 1.1632 | 0.1485 | -0.5246 | 0.1419 | -0.0397 | 0.1458 | 1.3051 |
| 308.15 | 0.2253 | 0.2292 | -1.7589 | 0.2300 | -2.1078 | 0.2218 | -0.0153 | 0.2310 | -2.5309 |
| 313.15 | 0.3511 | 0.3457 | 1.5622 | 0.3375 | 3.8931 | 0.3408 | -0.0294 | 0.3584 | -2.0695 |
| 318.15 | 0.5000 | 0.5018 | -0.3682 | 0.4659 | 6.8154 | 0.5149 | 0.0299 | 0.4968 | 0.6372 |
|  |  |  |  |  |  |  |  |  |  |
| *w*=0.6 |  |  |  |  |  |  |  |  |  |
| 288.15 | 0.0492 | 0.0458 | 6.9249 | 0.0486 | 1.3050 | 0.0488 | -0.0079 | 0.0505 | -2.5652 |
| 293.15 | 0.0798 | 0.0778 | 2.4163 | 0.0793 | 0.5857 | 0.0798 | 0.0009 | 0.0773 | 3.0996 |
| 298.15 | 0.1215 | 0.1252 | -3.0940 | 0.1253 | -3.1828 | 0.1252 | 0.0308 | 0.1185 | 2.4262 |
| 303.15 | 0.1950 | 0.1915 | 1.8002 | 0.1909 | 2.0971 | 0.1889 | -0.0312 | 0.1931 | 0.9792 |
| 308.15 | 0.2672 | 0.2789 | -4.3854 | 0.2783 | -4.1644 | 0.2746 | 0.0277 | 0.2742 | -2.6399 |
| 313.15 | 0.4004 | 0.3883 | 3.0384 | 0.3864 | 3.5117 | 0.3856 | -0.0371 | 0.4045 | -1.0191 |
| 318.15 | 0.5142 | 0.5179 | -0.735 | 0.5089 | 1.0307 | 0.5240 | 0.0191 | 0.5189 | -0.9240 |
|  |  |  |  |  |  |  |  |  |  |
| *w*=0.7 |  |  |  |  |  |  |  |  |  |
| 288.15 | 0.0676 | 0.0574 | 15.1401 | 0.0606 | 10.3680 | 0.0623 | -0.0794 | 0.0667 | 1.3751 |
| 293.15 | 0.0846 | 0.0962 | -13.6573 | 0.0964 | -13.8276 | 0.0984 | 0.1627 | 0.0868 | -2.6011 |
| 298.15 | 0.1509 | 0.1515 | -0.3539 | 0.1482 | 1.8448 | 0.1493 | -0.0106 | 0.1474 | 2.3150 |
| 303.15 | 0.2304 | 0.2249 | 2.3767 | 0.2193 | 4.7949 | 0.2180 | -0.0535 | 0.2276 | 1.2256 |
| 308.15 | 0.3128 | 0.3160 | -1.0336 | 0.3110 | 0.5891 | 0.3071 | -0.0183 | 0.3163 | -1.1294 |
| 313.15 | 0.4233 | 0.4216 | 0.3975 | 0.4203 | 0.7256 | 0.4180 | -0.0127 | 0.4278 | -1.0645 |
| 318.15 | 0.5352 | 0.5358 | -0.1089 | 0.5402 | -0.9352 | 0.5510 | 0.0294 | 0.5393 | -0.7508 |
|  |  |  |  |  |  |  |  |  |  |
| *w*=0.8 |  |  |  |  |  |  |  |  |  |
| 288.15 | 0.0795 | 0.0685 | 13.8155 | 0.0736 | 7.4205 | 0.0746 | -0.0622 | 0.0788 | 0.9248 |
| 293.15 | 0.1033 | 0.1124 | -8.7993 | 0.1137 | -10.0825 | 0.1153 | 0.1162 | 0.1051 | -1.7729 |
| 298.15 | 0.1718 | 0.1729 | -0.6449 | 0.1699 | 1.1196 | 0.1709 | -0.0054 | 0.1693 | 1.4681 |
| 303.15 | 0.2460 | 0.2509 | -1.9794 | 0.2447 | 0.5446 | 0.2436 | -0.0097 | 0.2462 | -0.0943 |
| 308.15 | 0.3545 | 0.3442 | 2.8896 | 0.3379 | 4.6686 | 0.3347 | -0.0557 | 0.3529 | 0.4388 |
| 313.15 | 0.4437 | 0.4482 | -1.0143 | 0.4461 | -0.5381 | 0.4442 | 0.0010 | 0.4484 | -1.0437 |
| 318.15 | 0.5560 | 0.5556 | 0.0594 | 0.5623 | -1.1340 | 0.5705 | 0.0261 | 0.5574 | -0.2654 |
|  |  |  |  |  |  |  |  |  |  |
| *w*=0.9 |  |  |  |  |  |  |  |  |  |
| 288.15 | 0.0926 | 0.0813 | 9.1208 | 0.0883 | 4.6587 | 0.0891 | -0.0374 | 0.0923 | 0.3608 |
| 293.15 | 0.1248 | 0.1294 | -4.4965 | 0.1317 | -5.6083 | 0.1326 | 0.0632 | 0.1257 | -0.7710 |
| 298.15 | 0.1905 | 0.1933 | -0.7668 | 0.1906 | -0.0662 | 0.1903 | -0.0007 | 0.1889 | 0.8248 |
| 303.15 | 0.2620 | 0.2723 | -2.8216 | 0.2663 | -1.6468 | 0.2640 | 0.0077 | 0.2638 | -0.7167 |
| 308.15 | 0.3726 | 0.3629 | 2.9919 | 0.3581 | 3.8836 | 0.3545 | -0.0484 | 0.3704 | 0.5718 |
| 313.15 | 0.4616 | 0.4590 | -0.7260 | 0.4625 | -0.2008 | 0.4620 | 0.0010 | 0.4644 | -0.6220 |
| 318.15 | 0.5501 | 0.5530 | -0.0511 | 0.5733 | 0.2044 | 0.5852 | 0.0187 | 0.5714 | 0.5495 |
| Average ARD% | | 3.9030 |  | 4.6063 |  | 3.2657 |  | 1.8141 |  |
| Average RMSD·102 | | 0.5548 |  | 1.3089 |  | 0.8266 |  | 0.3900 |  |

**Table S4 Values of experimental mole-fraction solubility (*x*1), calculated solubility ), relative deviation (RD) of N-PTSA in binary solvent (n-propanol (w) + water) at different temperature**

| T/K | *x* | Apelblat |  | λh |  | MA |  | NRTL |  |
| --- | --- | --- | --- | --- | --- | --- | --- | --- | --- |
|  | 100RD |  | 100RD |  | 100RD |  | 100RD |
| *w*=0.4 |  |  |  |  |  |  |  |  |  |
| 288.15 | 0.0331 | 0.0295 | 10.656 | 0.0302 | 8.6577 | 0.0320 | -0.0318 | 0.0341 | -3.0469 |
| 293.15 | 0.0500 | 0.0503 | -0.7240 | 0.0514 | -2.8380 | 0.0517 | 0.0354 | 0.0490 | 1.9518 |
| 298.15 | 0.0785 | 0.0829 | -5.6414 | 0.0849 | -8.1150 | 0.0824 | 0.0496 | 0.0757 | 3.6003 |
| 303.15 | 0.1349 | 0.1325 | 1.7521 | 0.1356 | -0.5324 | 0.1295 | -0.0400 | 0.1314 | 2.5856 |
| 308.15 | 0.2048 | 0.2056 | -0.4009 | 0.2083 | -1.6836 | 0.2009 | -0.0193 | 0.2077 | -1.4173 |
| 313.15 | 0.3115 | 0.3104 | 0.3472 | 0.3055 | 1.9359 | 0.3077 | -0.0120 | 0.3201 | -2.7750 |
| 318.15 | 0.4560 | 0.4564 | -0.0946 | 0.4251 | 6.7687 | 0.4660 | 0.0218 | 0.4595 | -0.7694 |
|  |  |  |  |  |  |  |  |  |  |
| *w*=0.5 |  |  |  |  |  |  |  |  |  |
| 288.15 | 0.0464 | 0.0398 | 14.2243 | 0.0443 | 4.5966 | 0.0452 | -0.0252 | 0.0476 | -2.5385 |
| 293.15 | 0.0702 | 0.0683 | 2.6624 | 0.0713 | -1.6718 | 0.0717 | 0.0224 | 0.0688 | 2.0158 |
| 298.15 | 0.1066 | 0.1109 | -4.0435 | 0.1118 | -4.8528 | 0.1106 | 0.0376 | 0.1036 | 2.7853 |
| 303.15 | 0.1679 | 0.1709 | -1.8016 | 0.1695 | -0.9469 | 0.166 | -0.0115 | 0.1651 | 1.6677 |
| 308.15 | 0.2465 | 0.2508 | -1.7486 | 0.2476 | -0.4397 | 0.2428 | -0.0150 | 0.2489 | -0.9915 |
| 313.15 | 0.3611 | 0.3514 | 2.6958 | 0.3466 | 4.0211 | 0.3466 | -0.0400 | 0.3659 | -1.3354 |
| 318.15 | 0.4676 | 0.4712 | -0.7846 | 0.4631 | 0.9612 | 0.4838 | 0.0345 | 0.4786 | -2.3481 |
|  |  |  |  |  |  |  |  |  |  |
| *w*=0.6 |  |  |  |  |  |  |  |  |  |
| 288.15 | 0.0596 | 0.0513 | 13.7846 | 0.0577 | 3.0615 | 0.0582 | -0.0219 | 0.0608 | -2.0747 |
| 293.15 | 0.0877 | 0.0853 | 2.6985 | 0.0890 | -1.5483 | 0.0895 | 0.0205 | 0.0863 | 1.5489 |
| 298.15 | 0.1306 | 0.1337 | -2.3814 | 0.1337 | -2.3155 | 0.1332 | 0.0198 | 0.1274 | 2.4822 |
| 303.15 | 0.1901 | 0.1985 | -4.4200 | 0.1946 | -2.3815 | 0.1925 | 0.0130 | 0.1882 | 0.9841 |
| 308.15 | 0.2749 | 0.2797 | -1.7513 | 0.2738 | 0.4169 | 0.2706 | -0.0156 | 0.2764 | -0.5277 |
| 313.15 | 0.3912 | 0.3757 | 3.9652 | 0.3709 | 5.1862 | 0.3705 | -0.0528 | 0.3928 | -0.4010 |
| 318.15 | 0.4758 | 0.4820 | -1.3163 | 0.4825 | -1.4154 | 0.4949 | 0.0401 | 0.4903 | -3.0541 |
|  |  |  |  |  |  |  |  |  |  |
| *w*=0.7 |  |  |  |  |  |  |  |  |  |
| 288.15 | 0.0689 | 0.0630 | 8.4936 | 0.0673 | 2.3570 | 0.0680 | -0.0136 | 0.0702 | -1.9149 |
| 293.15 | 0.1002 | 0.0986 | 1.5514 | 0.1010 | -0.7808 | 0.1013 | 0.0112 | 0.0987 | 1.4918 |
| 298.15 | 0.1447 | 0.1475 | -1.9468 | 0.1476 | -2.0287 | 0.1468 | 0.0147 | 0.1417 | 2.1010 |
| 303.15 | 0.2060 | 0.2115 | -2.7025 | 0.2098 | -1.8421 | 0.2073 | 0.0063 | 0.2041 | 0.9297 |
| 308.15 | 0.2866 | 0.2916 | -1.7551 | 0.2887 | -0.7629 | 0.2854 | -0.0040 | 0.2885 | -0.6834 |
| 313.15 | 0.4005 | 0.3872 | 3.3255 | 0.3839 | 4.1470 | 0.3839 | -0.0414 | 0.4023 | -0.4524 |
| 318.15 | 0.4912 | 0.4964 | -1.0723 | 0.4921 | -0.1860 | 0.5051 | 0.0285 | 0.5034 | -2.4844 |
|  |  |  |  |  |  |  |  |  |  |
| *w*=0.8 |  |  |  |  |  |  |  |  |  |
| 288.15 | 0.0754 | 0.0700 | 7.2012 | 0.0736 | 2.3207 | 0.0741 | -0.0172 | 0.0766 | -1.6028 |
| 293.15 | 0.1076 | 0.1075 | 0.0871 | 0.1092 | -1.4514 | 0.1096 | 0.0184 | 0.1064 | 1.0995 |
| 298.15 | 0.1546 | 0.1582 | -2.3404 | 0.1577 | -2.0243 | 0.1573 | 0.0177 | 0.1518 | 1.8186 |
| 303.15 | 0.2198 | 0.2235 | -1.6541 | 0.2214 | -0.7300 | 0.2196 | -0.0011 | 0.2175 | 1.0468 |
| 308.15 | 0.3030 | 0.3038 | -0.2739 | 0.3014 | 0.5333 | 0.2985 | -0.0147 | 0.3038 | -0.2833 |
| 313.15 | 0.4057 | 0.3984 | 1.8003 | 0.3965 | 2.2642 | 0.3959 | -0.0242 | 0.4093 | -0.8800 |
| 318.15 | 0.4880 | 0.5050 | -0.6542 | 0.5036 | -0.3655 | 0.5129 | 0.0222 | 0.5133 | -2.2990 |
|  |  |  |  |  |  |  |  |  |  |
| *w*=0.9 |  |  |  |  |  |  |  |  |  |
| 288.15 | 0.0792 | 0.0710 | 10.3671 | 0.0765 | 3.4994 | 0.0775 | -0.0218 | 0.0800 | -0.9815 |
| 293.15 | 0.1124 | 0.1112 | 1.0664 | 0.1142 | -1.5643 | 0.1146 | 0.0195 | 0.1114 | 0.8757 |
| 298.15 | 0.1606 | 0.1659 | -3.3013 | 0.1659 | -3.2982 | 0.1647 | 0.0257 | 0.1589 | 1.0069 |
| 303.15 | 0.2288 | 0.2361 | -3.2140 | 0.2335 | -2.0764 | 0.2303 | 0.0063 | 0.2284 | 0.1836 |
| 308.15 | 0.3215 | 0.3220 | -0.1590 | 0.3179 | 1.1223 | 0.3138 | -0.0239 | 0.3225 | -0.3251 |
| 313.15 | 0.4330 | 0.4215 | 2.6755 | 0.4170 | 3.7075 | 0.4174 | -0.0362 | 0.4331 | -0.0146 |
| 318.15 | 0.5256 | 0.5309 | -1.0134 | 0.5265 | -0.1757 | 0.5427 | 0.0325 | 0.5333 | -1.4655 |
| Average ARD% | | 3.2034 |  | 2.4186 |  | 2.3358 |  | 1.5438 |  |
| Average RMSD·102 | | 0.5547 |  | 0.7382 |  | 0.8016 |  | 0.4604 |  |

**Table S5** Apparent thermodynamic parameters and R2 values of N-PTSA dissolution in different pure solvents

| *w* | Δsol*H*0/kJ·mol-1 | Δsol*G*0/kJ·mol-1 | Δsol*S*0/kJ·K-1·mol-1 | R2 | ζH | ζTS |
| --- | --- | --- | --- | --- | --- | --- |
| methanol + water |  |  |  |  |  |  |
| 0.4 | 97.4842 | 6.4729 | 0.3008 | 0.9999 | 51.7170 | 48.2830 |
| 0.5 | 89.3285 | 5.8764 | 0.2758 | 0.9993 | 51.7005 | 48.2995 |
| 0.6 | 81.3244 | 5.1981 | 0.2516 | 0.9951 | 51.6507 | 48.3493 |
| 0.7 | 63.4306 | 4.1662 | 0.1959 | 0.9887 | 51.6978 | 48.3022 |
| 0.8 | 51.3546 | 3.5717 | 0.1579 | 0.9904 | 51.8014 | 48.1986 |
| 0.9 | 42.5477 | 3.2195 | 0.1300 | 0.9921 | 51.9661 | 48.0339 |
| ethanol + water |  |  |  |  |  |  |
| 0.4 | 81.4846 | 6.0364 | 0.2493 | 0.9951 | 51.9232 | 48.0768 |
| 0.5 | 69.6988 | 5.0229 | 0.2137 | 0.9981 | 51.8690 | 48.1310 |
| 0.6 | 60.2472 | 4.3927 | 0.1846 | 0.9962 | 51.8917 | 48.1083 |
| 0.7 | 55.3455 | 4.0267 | 0.1696 | 0.9876 | 51.8876 | 48.1124 |
| 0.8 | 51.6577 | 3.7507 | 0.1583 | 0.9894 | 51.8835 | 48.1165 |
| 0.9 | 47.7701 | 3.5236 | 0.1462 | 0.9935 | 51.9147 | 48.0853 |
| n-propanol + water |  |  |  |  |  |  |
| 0.4 | 67.9705 | 5.2238 | 0.2074 | 0.9987 | 51.9981 | 48.0019 |
| 0.5 | 60.1588 | 4.6608 | 0.1834 | 0.9979 | 52.0149 | 47.9851 |
| 0.6 | 54.3128 | 4.2978 | 0.1653 | 0.9967 | 52.0598 | 47.9402 |
| 0.7 | 50.9198 | 4.0963 | 0.1547 | 0.9977 | 52.0954 | 47.9046 |
| 0.8 | 49.1115 | 3.9584 | 0.1492 | 0.9974 | 52.0996 | 47.9004 |
| 0.9 | 49.3996 | 3.8353 | 0.1506 | 0.9969 | 52.0194 | 47.9806 |
